# Supplementary material for: Altered Ca2+ Homeostasis in Red Blood Cells of Polycythemia Vera Patients Following Disturbed Organelle Sorting during Terminal Erythropoiesis
Source: MDPI journal article supplement (doi:10.3390/cells11010049), 2021-12-24
Supplement: s1 [file s1]

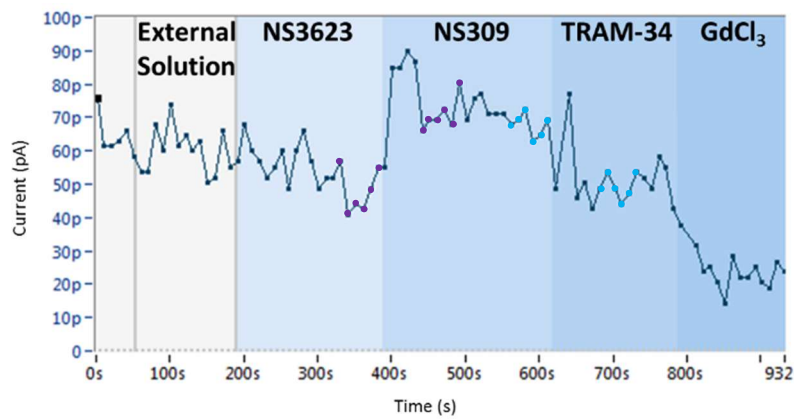

**Supplemental Figure S1.** Supplemental Figure S1. Patch-clamp protocol timeline with a representative RBC response from a healthy individual. Upon cell catch external solution was added to the wells followed by 10  $\mu$ M NS3623, 10  $\mu$ M NS309, 5  $\mu$ M TRAM-34 and 30  $\mu$ M GdCl<sub>3</sub>. Currents were measured at room temperature applying -100 to +80 mV ramp voltage protocol for 300 ms, at a holding potential of -30 mV. The cell response was measured in pA at +80 mV.

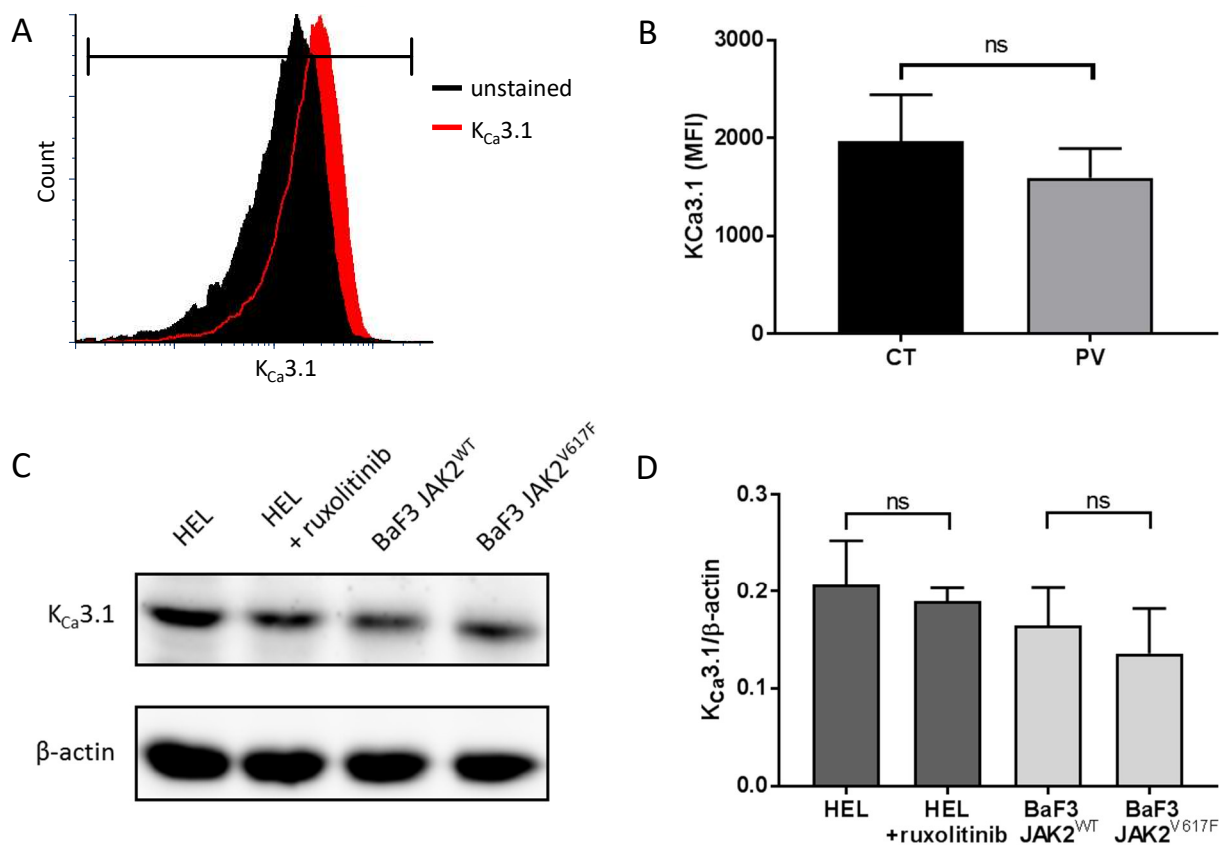

**Supplemental Figure S2.** JAK2<sup>V617F</sup> does not alter Gárdos expression in PV RBCs, BaF3 JAK2<sup>V617F</sup> and HEL cell lines. Representative flow cytometry histograms of K<sub>Ca</sub>3.1 expression on **A**) CT RBC surface (red), unstained RBCs (black). **B**) K<sub>Ca</sub>3.1 MFI quantification in CT (black) and PV (grey) RBCs; N=4, Mann-Whitney test, ns – not significant. **C**) Representative SDS-PAGE immunoblot of K<sub>Ca</sub>3.1 expression in HEL with or without 0.3  $\mu$ M ruxolitinib treatment for 24h and BaF3 JAK2<sup>WT</sup>, and BaF3 JAK2<sup>V617F</sup>. **D**) Quantitative analysis of K<sub>Ca</sub>3.1 expression from SDS-PAGE immunoblots in HEL cells with or without 0.3  $\mu$ M ruxolitinib treatment for 24h and BaF3 JAK2<sup>WT</sup>, and BaF3 JAK2<sup>V617F</sup> cells; N=4, Mann-Whitney test, ns – not significant.

**Supplemental Table S1.** Quality control filters. Only NS309 and TRAM-34 responder cells were used in the analysis. A cell was considered NS309 responder, if it displayed at least 20% current increase compared to baseline. For RBCs additional QC of at least 10 pA increase was applied to avoid false-positive signal from noise. NS309 induced currents over 500 pA for BaF3 cells and over 400 pA HEL cells were considered as outgroups. No such outgroups were observed in RBCs. A cell was considered TRAM-34 responder, if it displayed at least 20% current decrease compared to the current upon NS309 addition. For RBCs additional QC of at least 5 pA decrease was applied to avoid false-positive signal from noise. Inf – infinity.

|                               | Quality Control filters  | RBCs              |              | BaF3        |              | HEL         |              |
|-------------------------------|--------------------------|-------------------|--------------|-------------|--------------|-------------|--------------|
|                               |                          | Lower value       | Higher value | Lower value | Higher value | Lower value | Higher value |
| Seal resistance (M $\Omega$ ) | Cell catch               | 5                 | Inf          | 5           | Inf          | 5           | Inf          |
|                               | Whole-cell               | 50                | Inf          | 50          | Inf          | 50          | Inf          |
|                               | Before compound addition | 900               | Inf          | 500         | Inf          | 500         | Inf          |
|                               | End of the experiment    | 1500              | Inf          | 500         | Inf          | 500         | Inf          |
| Current (pA)                  | Inward current values    | -Inf              | -20          | -Inf        | -25          | -Inf        | -25          |
|                               | Outward current values   | 16                | Inf          | 18          | Inf          | 18          | Inf          |
|                               | NS309 responders         | 20 %, $\Delta$ 10 | Inf          | 20 %        | 500          | 20 %        | 400          |
|                               | TRAM-34 block            | 20 %, $\Delta$ 5  | Inf          | 20 %        | Inf          | 20 %        | Inf          |
